# Supplementary material
Source: publisher figshare collection journal article supplement (https://acs.figshare.com/ndownloader/files/17416112)
Supplement: Supplementary file 1 [file 17416112]

## Supporting Information

### Investigation of Reduced Graphene Oxide and a Nb-Doped TiO<sub>2</sub> Nanotube Hybrid Structure To Improve the Gas-Sensing Response and Selectivity

Vardan Galstyan<sup>\*†</sup>, Andrea Ponzoni<sup>#</sup>, Iskandar Kholmanov<sup>‡</sup>, Marta M. Natile<sup>§</sup>, Elisabetta Comini<sup>†</sup>, Sherzod Nematov,<sup>†</sup> Giorgio Sberveglieri<sup>†</sup>

<sup>†</sup> Sensor Lab, Department of Information Engineering, University of Brescia, Via Valotti 9, 25133 Brescia, Italy

<sup>#</sup> CNR - National Institute of Optics (INO), Via Branze 45, 25123 Brescia, Italy

<sup>‡</sup> Department of Mechanical Engineering, The University of Texas at Austin, Austin, TX 78712, USA

<sup>§</sup> CNR-Institute of Condensed Matter Chemistry and Technologies for Energy, Department of Chemical Sciences, University of Padova, Via F. Marzolo 1, 35131 Padova, Italy

<sup>†</sup> The Tashkent State Technical University, Universitetskaya 2, 100069 Tashkent, Uzbekistan

\* E-mail: vardan.galstyan@unibs.it

#### Response/recovery times analysis

The response and recovery times were defined as the time to reach 90% of  $G_f - G_0$  when the gas is introduced and to recover to 70% of the original conductance in air.

Given the chamber volume (1 liter) and the gas-flow (0.2 l/min) the purging/filling time of the test chamber is about 300 s, which represent the lower measurable limit of our experimental setup. Tables S1–S4 present the response, the response and recovery times of the Nb–TiO<sub>2</sub> and RGO/Nb–TiO<sub>2</sub> (obtained with the optimal concentration of GO, 9 ng/mm<sup>2</sup>) samples towards different concentrations of H<sub>2</sub>, NH<sub>3</sub>, C<sub>3</sub>H<sub>6</sub>O and CO at 200 °C.

**Table S1.** The sensing parameters of the Nb–TiO<sub>2</sub> and RGO/Nb–TiO<sub>2</sub> (obtained with the 9 ng/mm<sup>2</sup> of GO) structures towards 120, 240 and 480 ppm of H<sub>2</sub> at 200 °C.

| Sample                  | H <sub>2</sub> concentration (ppm) | Response | Response time (s) | Recovery time (s) |
|-------------------------|------------------------------------|----------|-------------------|-------------------|
| Nb–TiO <sub>2</sub>     | 120                                | 2.8      | ≤ 300             | ≤ 300             |
|                         | 240                                | 5.9      | 480               | ≤ 300             |
|                         | 480                                | 14.8     | 750               | ≤ 300             |
| RGO/Nb–TiO <sub>2</sub> | 120                                | 28.4     | 930               | ≤ 300             |
|                         | 240                                | 54.9     | 750               | ≤ 300             |
|                         | 480                                | 77       | 480               | ≤ 300             |

**Table S2.** The sensing parameters of the Nb–TiO<sub>2</sub> and RGO/Nb–TiO<sub>2</sub> (obtained with the 9 ng/mm<sup>2</sup> of GO) structures towards 10, 20 and 30 ppm of NH<sub>3</sub> at 200 °C.

| Sample                  | NH <sub>3</sub> concentration (ppm) | Response | Response time (s) | Recovery time (s) |
|-------------------------|-------------------------------------|----------|-------------------|-------------------|
| Nb–TiO <sub>2</sub>     | 10                                  | 0.8      | 510               | 930               |
|                         | 20                                  | 1.6      | 660               | 810               |
|                         | 30                                  | 1.7      | 1020              | 870               |
| RGO/Nb–TiO <sub>2</sub> | 10                                  | 1.9      | 1500              | 2190              |
|                         | 20                                  | 6.9      | 1590              | 600               |
|                         | 30                                  | 7        | ≤ 300             | 720               |

**Table S3.** The sensing parameters of the Nb–TiO<sub>2</sub> and RGO/Nb–TiO<sub>2</sub> (obtained with the 9 ng/mm<sup>2</sup> of GO) structures towards 30, 60 and 120 ppm of C<sub>3</sub>H<sub>6</sub>O at 200 °C.

| Sample                  | C <sub>3</sub> H <sub>6</sub> O concentration (ppm) | Response    | Response time (s) | Recovery time (s) |
|-------------------------|-----------------------------------------------------|-------------|-------------------|-------------------|
| Nb–TiO <sub>2</sub>     | 30                                                  | 0.15        | ≤ 300             | 420               |
|                         | 60                                                  | 0.3         | ≤ 300             | ≥ 5100            |
|                         | 120                                                 | 0.4         | ≤ 300             | 390               |
| RGO/Nb–TiO <sub>2</sub> | 30                                                  | No response | –                 | –                 |
|                         | 60                                                  | No response | –                 | –                 |
|                         | 120                                                 | No response | –                 | –                 |

**Table S4.** The sensing parameters of the Nb–TiO<sub>2</sub> and RGO/Nb–TiO<sub>2</sub> (obtained with the 9 ng/mm<sup>2</sup> of GO) structures towards 30, 60 and 120 ppm of CO at 200 °C.

| Sample                  | CO concentration (ppm) | Response | Response time (s) | Recovery time (s) |
|-------------------------|------------------------|----------|-------------------|-------------------|
| Nb–TiO <sub>2</sub>     | 30                     | 0.06     | ≤ 300             | ≤ 300             |
|                         | 60                     | 0.4      | 1500              | ≤ 300             |
|                         | 120                    | 1.8      | 1470              | ≤ 300             |
| RGO/Nb–TiO <sub>2</sub> | 30                     | 0.2      | ≤ 300             | ≤ 300             |
|                         | 60                     | 0.3      | ≤ 300             | ≤ 300             |
|                         | 120                    | 0.5      | ≤ 300             | ≤ 300             |
